# Supplementary material for: Histone Variant MacroH2A1 Plays an Isoform-Specific Role in Suppressing Epithelial-Mesenchymal Transition
Source: PubMed Central journal article supplement (PMC5770377; doi:10.1038/s41598-018-19364-4), 2018-01-16
Supplement: 41598_2018_19364_MOESM1_ESM.pdf [file 41598_2018_19364_MOESM1_ESM.pdf]

# **Histone Variant MacroH2A1 Plays an Isoform-Specific Role in Suppressing Epithelial-Mesenchymal Transition**

**Dayle Q. Hodge, Jihong Cui, Matthew J. Gamble,  
Wenjun Guo**

**Supplementary Information**

# Supplementary Information

## Figure 1D

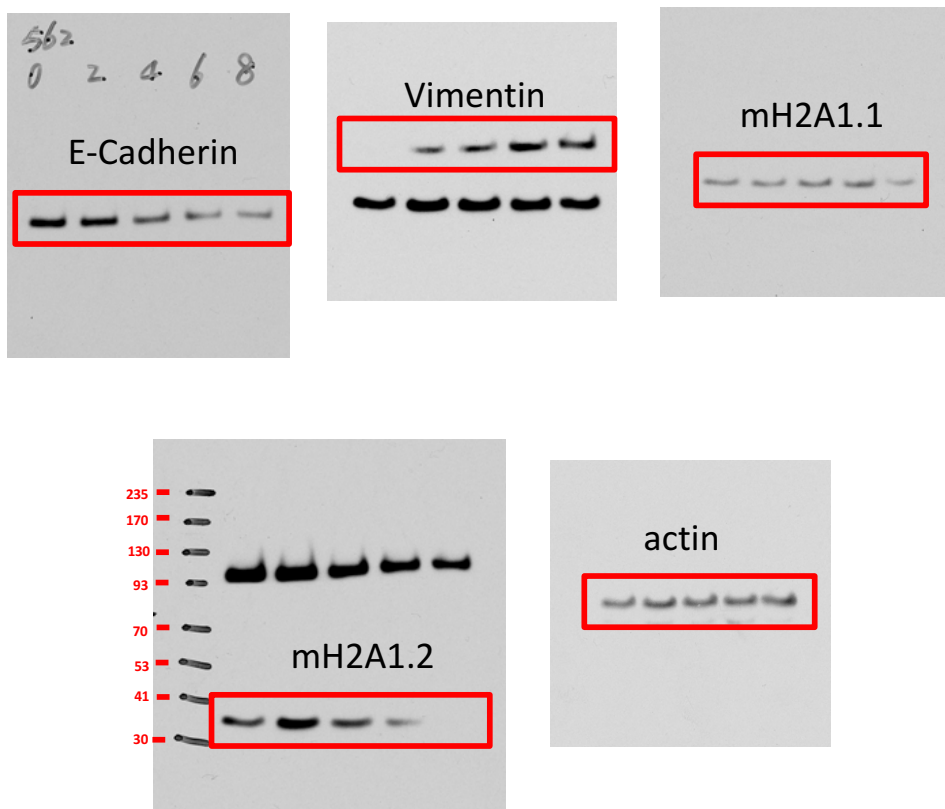

## Figure 2A – Left panel (Snail-ER)

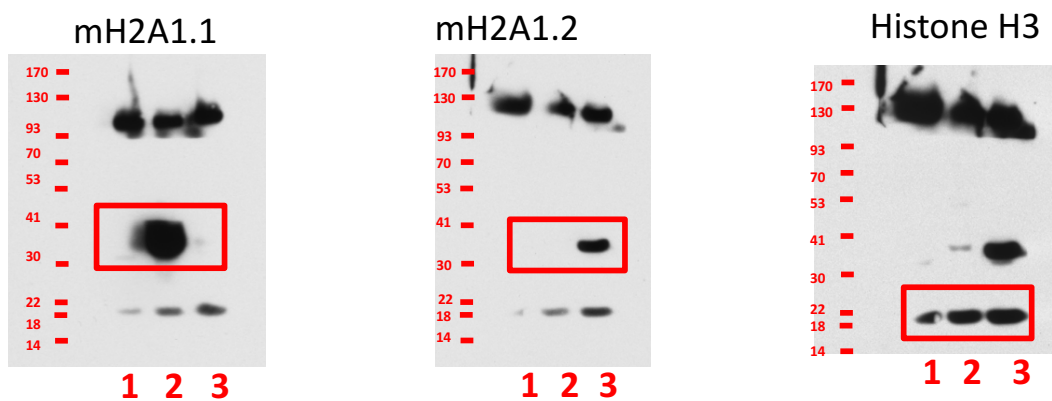

**Figure S1** Western blot scanned films. Boxes highlight cropped films used in the figures.

**Figure 2A – Right panel (Twist-ER)**

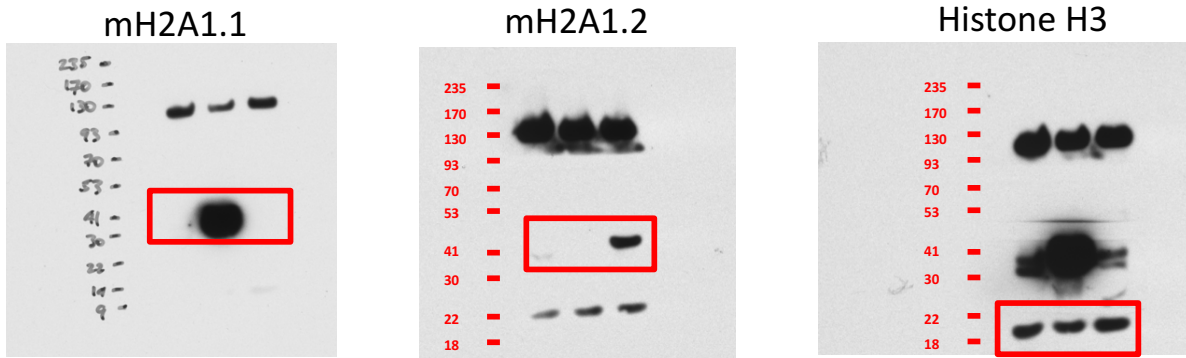

**Figure 3B – Left Panel**

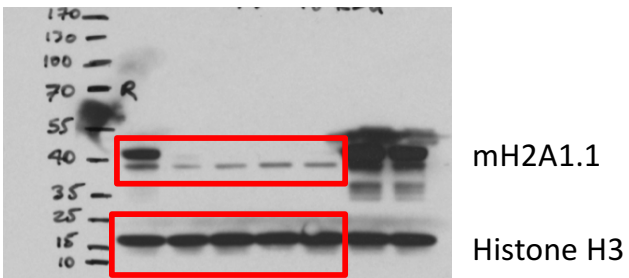

**Figure 3B – Right Panel**

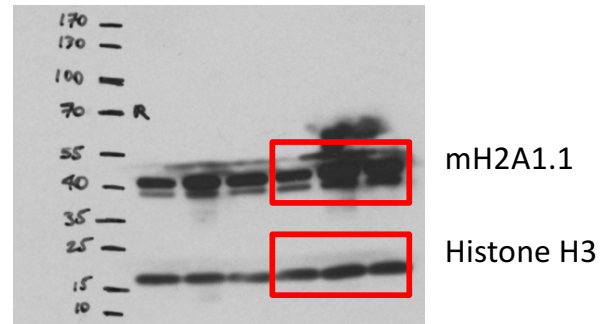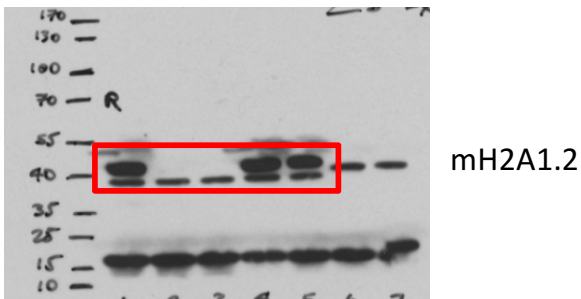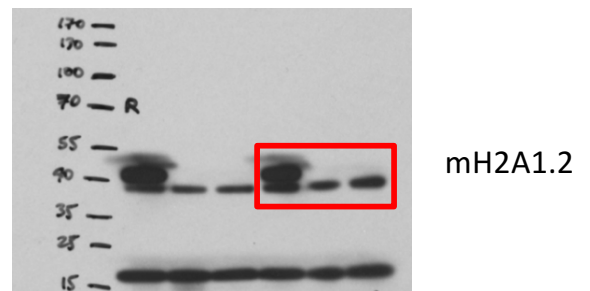

**Figure S1 Continued.**

**Figure 4A – MDA-MB-231**

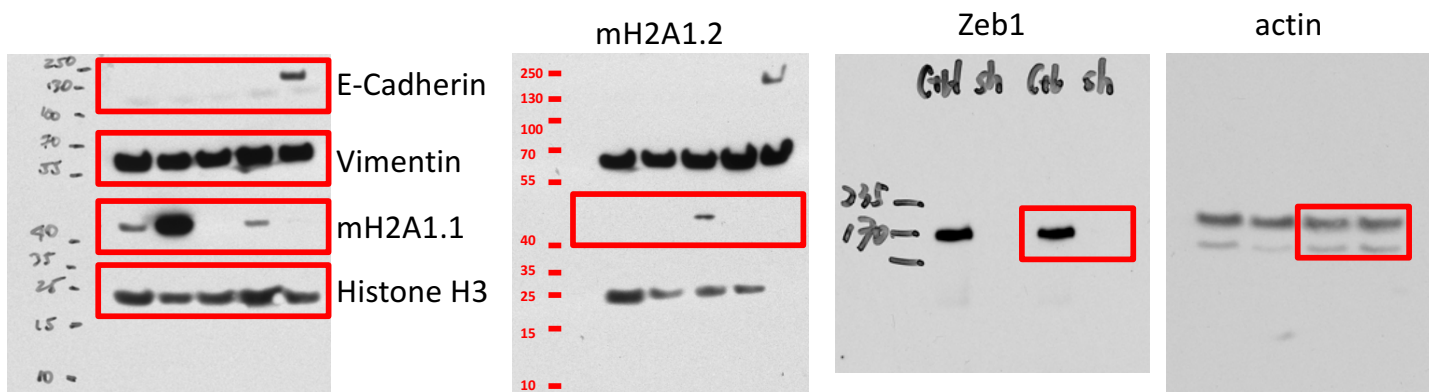

**Figure 4A – Full EMT SnailER**

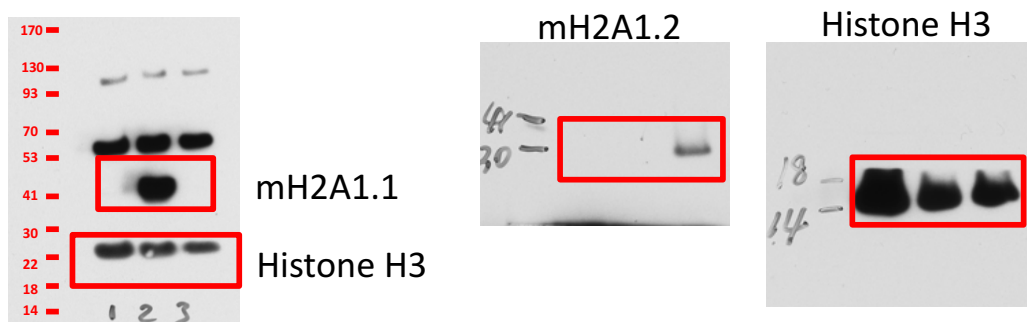

**Figure 4A – Full EMT Twist-ER**

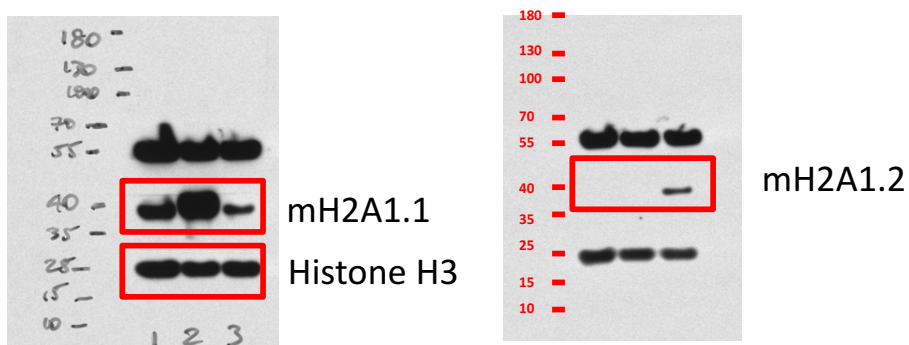

Figure 5A – Left panel

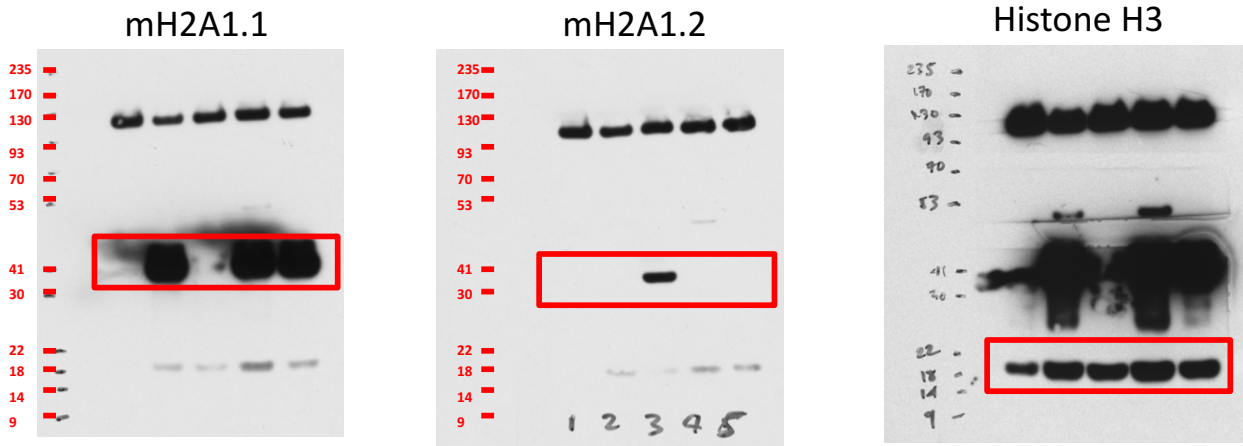

Figure 5A – Right panel

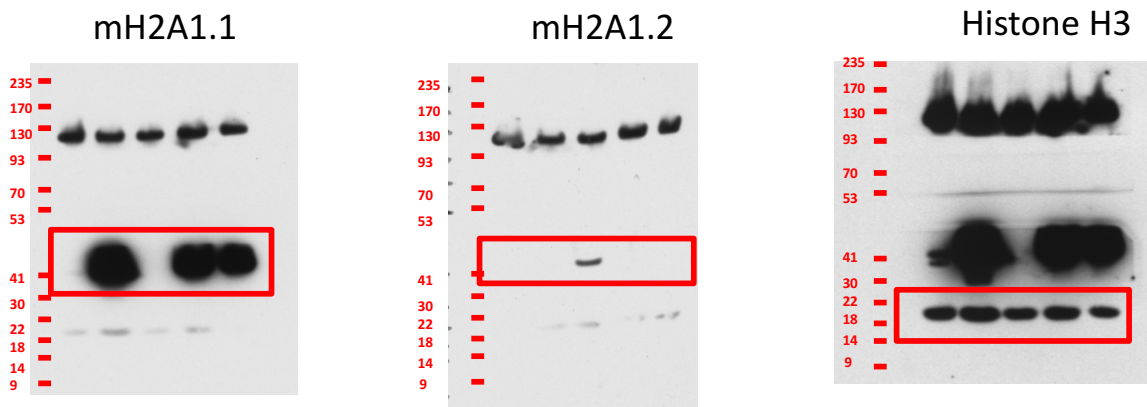

Figure S1 Continued.
